# Supplementary material
Source: HighWire-hosted journal article supplement (https://erj.ersjournals.com/content/51/1/1701457)
Supplement: inline-supplementary-material-1 [file inline-supplementary-material-1.pdf]

1 **SUPPLEMENTARY MATERIAL**

2 **Figure S1.** Bland- Altman plots of *FeNO* measurements at baseline (V0) and during follow-up (V1 and V2), comparing  
3 *FeNO* between V0-V1 (left), V1-V2 (middle) and V0-V2 (right).

4

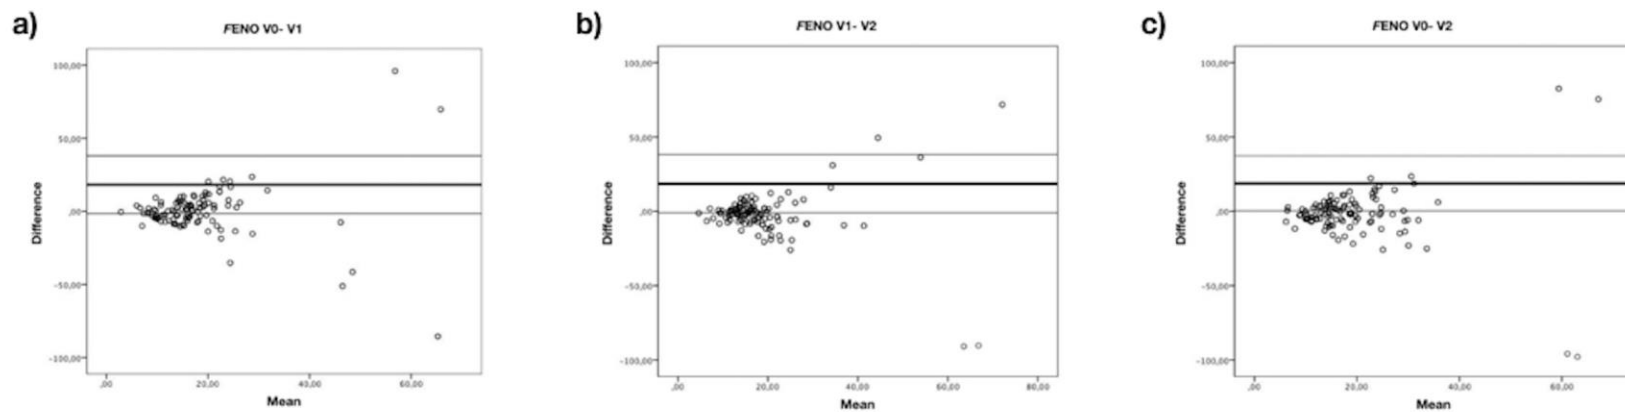

5

6

7

8

9

10

11

12 **Figure S2.** Longitudinal FeNO measurements for each patient during 12 months follow-up, according to the number of  
13 visits with FeNO levels  $\geq 20$  ppb.

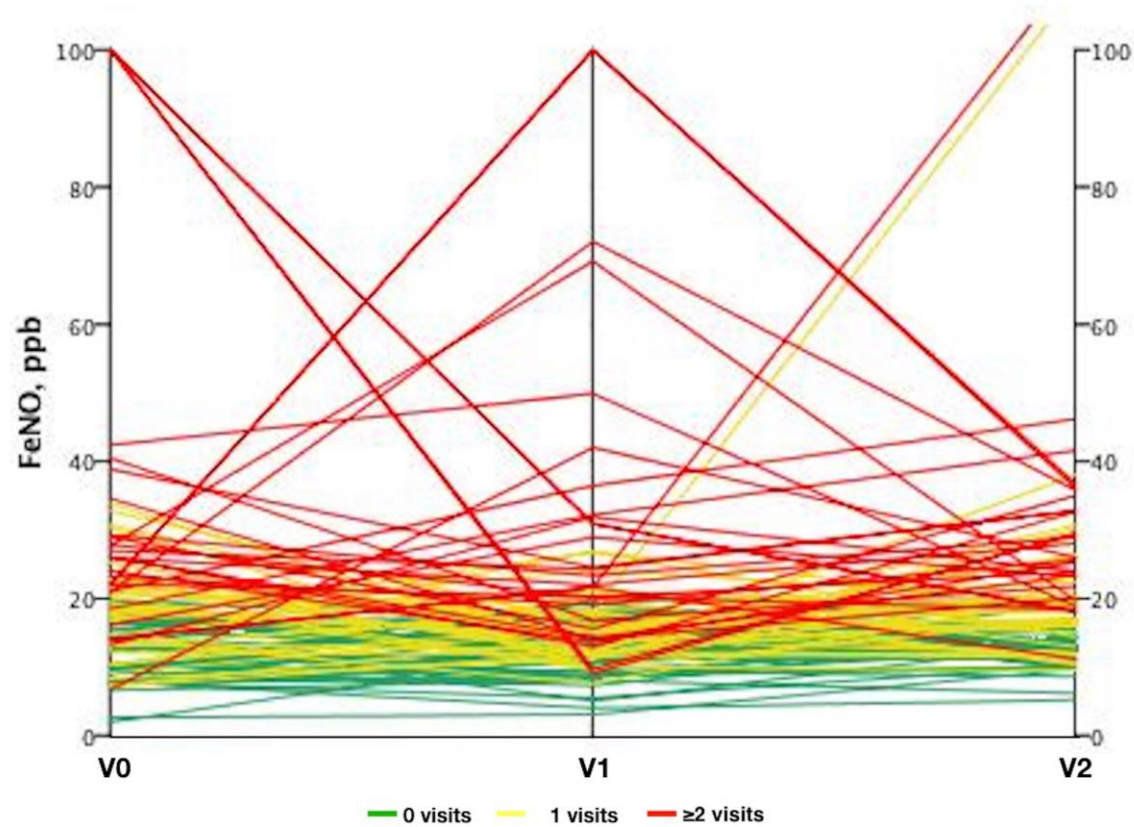

14
